# Supplementary material
Source: publisher site journal article supplement (https://www.dovepress.com/article/440263)
Supplement: Supplementary file 1 [file get_supplementary_file.php]

**Table S1. Top 5 GO terms**

| Top 5 GO | Genes |
| --- | --- |
| T-helper 17 cell lineage commitment | TGFB1, IRF4, BATF |
| positive regulation of T cell proliferation | CD86, CD6, NCKAP1L, JAK2, ITGAL,CARD11 |
| T cell activation | TGFB1, ICOSL, DOCK2, CARD11, VAV1 |
| myeloid dendritic cell differentiation | TGFB1, IRF4, BATF |
| immunological synapse | CD6, CD37, ITGAL, CARD11 |

**Table S2. Top 5 KEGG**

| Top 5 KEGG | Genes |
| --- | --- |
| Intestinal immune network for IgA production | CD86, TGFB1, ITGA4, TNFRSF13B, ICOSL |
| B cell receptor signaling pathway | INPP5D, CARD11, VAV1 |
| T cell receptor signaling pathway | GRAP2, CARD11, VAV1 |
| Th17 cell differentiation | TGFB1, IRF4, JAK2 |
| Cell adhesion molecules | CD86, ITGA4, CD6, ICOSL, ITGAL |

**Table S3. Overlapping genes selected from GO and KEGG**

| Genes | Repeated Counts |
| --- | --- |
| TGFB1 | 5 |
| CARD11 | 4 |
| ITGAL | 3 |
| CD86 | 3 |
| VAV1 | 3 |
| CD6 | 3 |
| BATF | 3 |
| ICOSL | 3 |
| IRF4 | 3 |
| JAK2 | 2 |


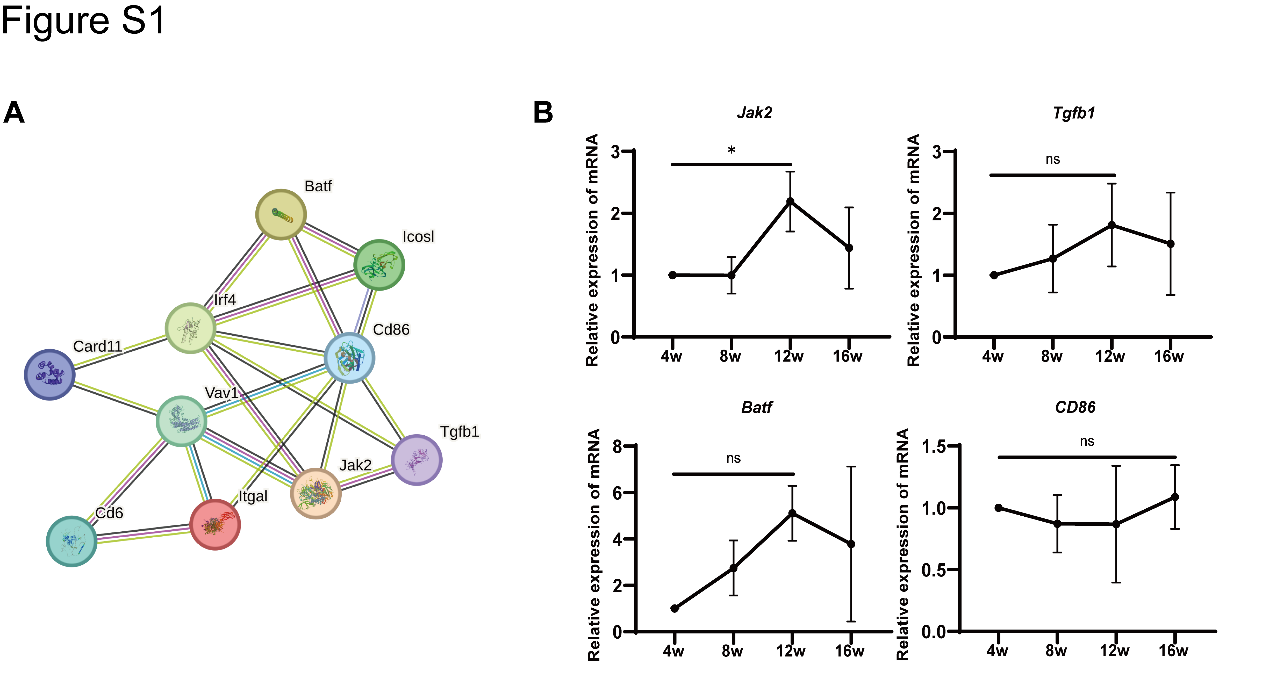


**Fig. S1.** (**A**) Protein‐protein interaction (PPI) network of the 10 overlapping genes selected from GO and KEGG. Network nodes represent proteins produced by a single, protein-coding gene locus. Edges represent protein-protein associations. (**B**) Validation of the mRNA expression levels of partial candidate genes in LGs by qRT-PCR. n = 3 mice per group. One-way ANOVA and Tukey test were used for multiple comparisons. Values are represented by means ± SD. *p<0.05, ns means no significance, compared with 4-week-old group.
